# Supplementary material for: Interspecific complementation-restoration of phenotype in Arabidopsis cuc2cuc3 mutant by sugarcane CUC2 gene
Source: PubMed Central journal article supplement (PMC8783490; doi:10.1186/s12870-022-03440-z), 2022-01-22
Supplement: 12870_2022_3440_MOESM1_ESM.pdf [file 12870_2022_3440_MOESM1_ESM.pdf]

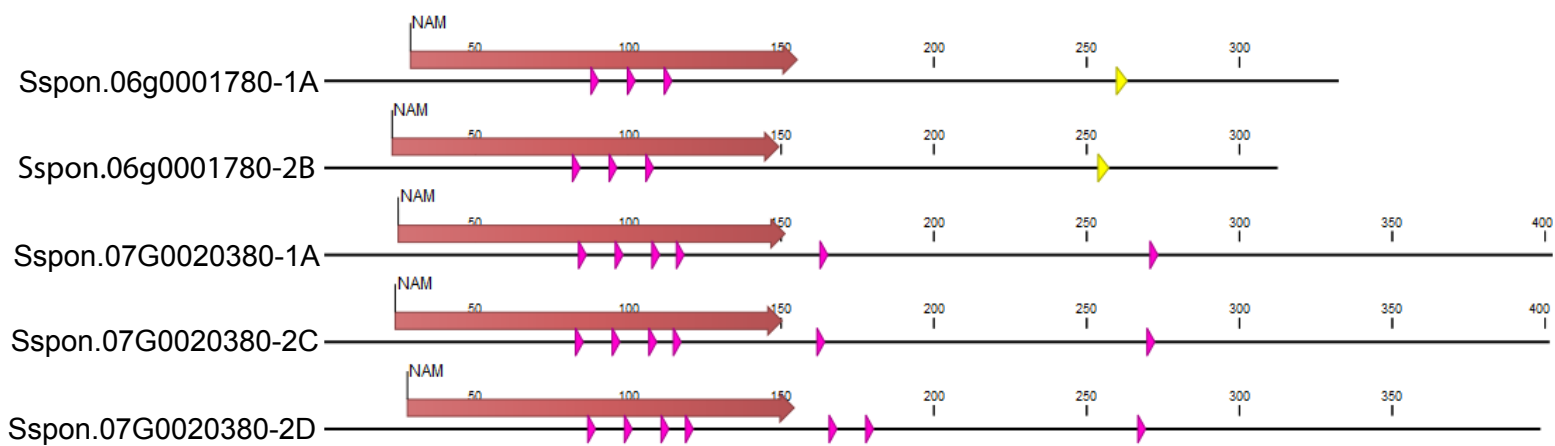

▶ N-glycosylation sites    ▶ Phosphorylation sites
