# Supplementary material for: Interspecific complementation-restoration of phenotype in Arabidopsis cuc2cuc3 mutant by sugarcane CUC2 gene
Source: PubMed Central journal article supplement (PMC8783490; doi:10.1186/s12870-022-03440-z), 2022-01-22

Col-0

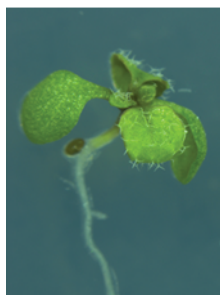

*cuc2-3*

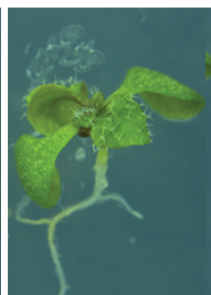

*cuc3-105*

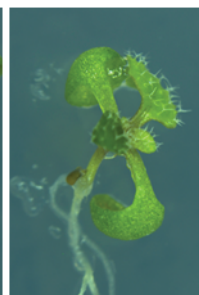

*cuc2-3cuc3-105*

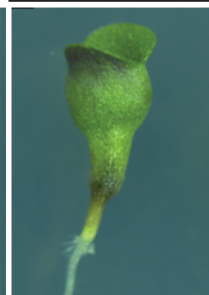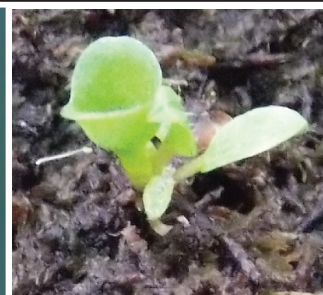

Supplement: 12870_2022_3440_MOESM3_ESM.pdf [file 12870_2022_3440_MOESM3_ESM.pdf]
